# Supplementary material for: Efficient separation of C2hydrocarbons in a permanently porous hydrogen-bonded organic framework
Source: Royal Society of Chemistry journal article supplement (doi:10.1039/c8cc04139c), 2018-01-01
Supplement: c8cc04139c1.pdf [file c8cc04139c1.pdf]

## Supplementary Information

### Efficient Separation of C<sub>2</sub> Hydrocarbons in a Permanently Porous Hydrogen-Bonded Organic Framework

Tae-Ung Yoon,<sup>†a</sup> Seung Bin Baek,<sup>\*†b</sup> Dongwook Kim,<sup>c</sup> Eun-Jung Kim,<sup>a</sup> Wang-Geun Lee,<sup>b</sup>  
Bhupendra Kumar Singh,<sup>b</sup> Myoung Soo Lah,<sup>c</sup> Youn-Sang Bae<sup>\*a</sup> and Kwang S. Kim<sup>\*b</sup>

\*Corresponding authors: [sepbirth@gmail.com](mailto:sepbirth@gmail.com) (S. B. Baek), [mowbae@yonsei.ac.kr](mailto:mowbae@yonsei.ac.kr) (Y.-S. Bae)  
and [kimks@unist.ac.kr](mailto:kimks@unist.ac.kr) (K. S. Kim)

## 1. General considerations

H<sub>3</sub>BTB was purchased from Tokyo Chemical Industry Co. Methanol and DMF were purchased from Samchun Chemical Co. H<sub>3</sub>BTB-DMF crystals were prepared by thoroughly dissolving excess H<sub>3</sub>BTB in minimal DMF in a hot oven, then cooling it down in a refrigerator. The resulting crystals were collected and dried in air, and then soaked into methanol. Standing the methanol solution in an oven at 50 °C produced HOF-BTB crystals suitable for X-ray diffraction analysis. TGA measurements were carried out at a rate of 5 °C/min over the temperature of 25-700 °C under an air atmosphere using a thermogravimeter (Pyris 1 TGA Lab System, Perkin Elmer). Powder X-ray diffraction patterns were recorded by a Rigaku MiniFlex diffractometer operated at 30 kV and 15 mA with a scan rate of 2.0 deg/min.

## 2. Gas adsorption experiments

All gas adsorption measurements were performed using a BELSORP-Mini II low-pressure gas adsorption measuring system (BEL Japan, Inc) equipped with a temperature control unit. At least 50 mg of the crystals were pretreated at 120 °C under vacuum for 15 hours before gas adsorption measurements. Adsorption isotherms were measured at 273 K and 295 K up to 1 bar. The BET surface area was calculated from a N<sub>2</sub> adsorption isotherm measured at 77 K. The extra high-purity quality (>99.999 %) of gases was used for all adsorption measurements. All the adsorption data were manipulated using BEL-Master software provided by BEL Japan Inc.

## 3. Fitting of isotherms and ideal adsorbed solution theory calculations<sup>1-3</sup>

The parameters for ideal adsorbed solution theory (IAST) selectivity calculations were obtained by fitting the experimentally measured pure single-component isotherms using the single-site Langmuir-Freundlich model, purely on the basis of giving the best fit with highest adjusted R<sup>2</sup>-values. The single-site Langmuir-Freundlich equation looks as follows:

$$q = \frac{q_{sat} \times b \times p^{1/n}}{1 + b \times p^{1/n}} \quad (1)$$

where,  $n$  represents the deviation from an ideal homogeneous surface. The parameters  $q_{sat}$ ,  $b$  and  $n$  can be determined by fitting the experimental adsorption isotherms ( $q$  versus  $p$ ). They are then

used to calculate IAST selectivity. The adsorption selectivity ( $S_{ads}$ ) for binary gas mixtures of components 1 and 2 is defined as:

$$S_{ads} = \frac{q_1/q_2}{p_1/p_2} \quad (2)$$

Where  $q_i$  is the molar loading of the species  $i$  and  $p_i$  is the partial pressure of species  $i$ . The integrals were computed at the website <http://integrals.wolfram.com> and the adsorbed phase composition that minimized the difference between the integrals of the two spreading pressures was found at the website <http://www.wolframalpha.com>. Selectivities were then calculated according to the equation 2.

#### 4. Breakthrough experiments

The breakthrough experiments for evaluating the potential of HOF-BTB for mixture gas separations were performed in a custom-built fixed bed equipment. Three mass flow controllers (0~100 ml/min) (Bronkhorst, Germany) were used to regulate the gas flow rates. Two of them were used for making combinations of C<sub>2</sub>H<sub>6</sub>/CH<sub>4</sub> or C<sub>2</sub>H<sub>4</sub>/CH<sub>4</sub> streams and the last one was used for He stream. First, this He stream was used for the in-situ regeneration of the adsorbent packed in the column, which is placed in a ventilated thermostatted oven for measurements at a constant temperature. Secondly, the He flow was mixed with hydrocarbon mixture (C<sub>2</sub>H<sub>6</sub>/CH<sub>4</sub> or C<sub>2</sub>H<sub>4</sub>/CH<sub>4</sub>) to adjust the total hydrocarbon pressure. The effluent gas composition from the column was measured online by a mass spectrometer (Extrel Max300-LG, USA). The detailed description of breakthrough experimental setup and procedures can also be found elsewhere.<sup>4,5</sup> The as-synthesized powder sample was pelletized into binderless pellets with a size of 500~1000 μm using a carver press (Carver, Inc., USA). The obtained pellets were initially activated at 393 K for 15 h under vacuum and then packed into a stainless steel column (15 cm × 0.44 cm). The remainder of the column was filled with glass beads with a diameter of 750 μm. Before the breakthrough experiments, the column was degassed by a He flow of 40 ml/min at 393 K for 2 h to remove all the impurities adsorbed during the packing procedure. All the experiments were carried out at 298 K and 1 bar. Before each measurement, a He flow of 40 ml/min at 298 K was introduced into the column for at least 10 min. Simultaneously, a feed mixture for a breakthrough run was prepared as follows: a 20 ml/min of He flow was combined with a 20 ml/min of equimolar hydrocarbon

mixture ( $C_2H_6/CH_4$  or  $C_2H_4/CH_4$ ) and then mixed well with each other by flowing through a gas mixer. It should be noted that the obtained mixture can be considered as equimolar hydrocarbon mixture ( $C_2H_6/CH_4$  or  $C_2H_4/CH_4$ ) at 0.5 bar. At  $t = 0$ , the He flow for in-situ regeneration was stopped and a flow of the feed mixture was introduced into the packed column.

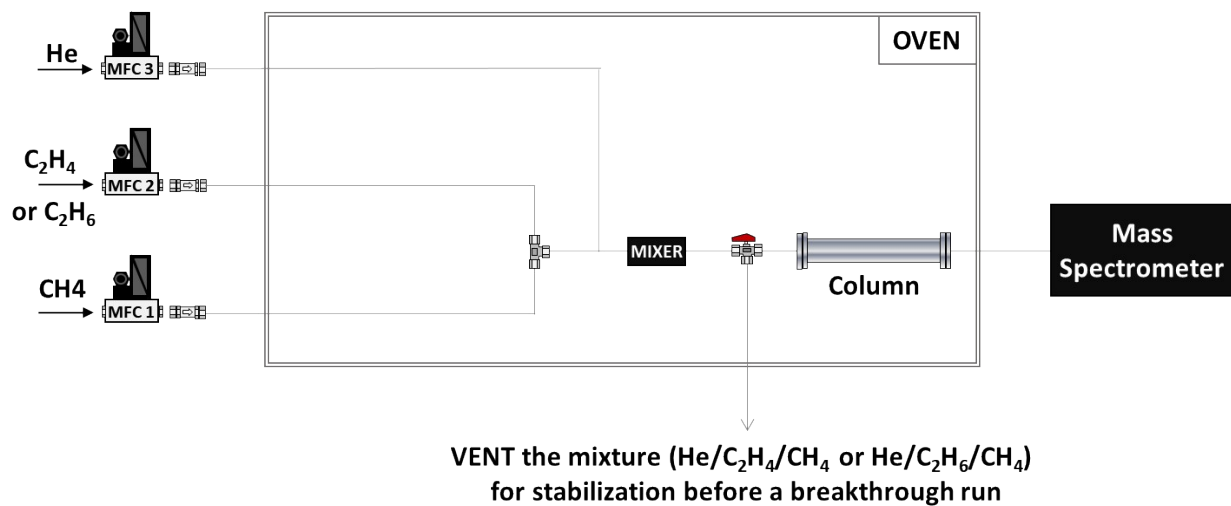

**Scheme S1.** A schematic diagram of the dynamic breakthrough experimental setup

**Table S1.** Comparison of C<sub>2</sub>H<sub>4</sub> and C<sub>2</sub>H<sub>6</sub> uptakes in various organic frameworks.

| Materials     | SA <sub>BET</sub><br>(m <sup>2</sup> /g) | C <sub>2</sub> H <sub>4</sub> (mmol/g) |       | C <sub>2</sub> H <sub>6</sub> (mmol/g) |       | Qst (kJ/mol)                  |                               | Ref       |
|---------------|------------------------------------------|----------------------------------------|-------|----------------------------------------|-------|-------------------------------|-------------------------------|-----------|
|               |                                          | 273 K                                  | 295 K | 273 K                                  | 295 K | C <sub>2</sub> H <sub>4</sub> | C <sub>2</sub> H <sub>6</sub> |           |
| MCOF-1        | 874                                      | -                                      | 1.61  | -                                      | 1.97  | 19                            | 41                            | 6         |
| ZnP-CTF-400   | 1411                                     | -                                      | -     | 4.25                                   | 3.12  | -                             | 30-25                         | 7         |
| ZnP-CTF-500   | 1848                                     | -                                      | -     | 5.58                                   | 4.02  | -                             | -                             | 7         |
| ZnP-CTF-600   | 1331                                     | -                                      | -     | 3.34                                   | 2.41  | -                             | -                             | 7         |
| MesoPOF-1     | 1027                                     | -                                      | -     | 2.54                                   | -     | -                             | -                             | 8         |
| DBA-3D-COF-1  | 5083                                     | 2.52                                   | 1.70  | 3.24                                   | 2.09  | 15.9                          | 16.8                          | 9         |
| Ni-DBA-3D-COF | 4763                                     | 2.36                                   | 1.83  | 3.02                                   | 2.16  | 9.7                           | 11.6                          | 9         |
| N-COF         | 692                                      | -                                      | -     | -                                      | 3.09  | -                             | 35.7                          | 10        |
| P-COF         | 435                                      | -                                      | -     | -                                      | 2.64  | -                             | -                             | 10        |
| T-COF         | 1149                                     | -                                      | -     | -                                      | 5.31  | -                             | -                             | 10        |
| HOF-BTB       | 955                                      | 3.80                                   | 2.48  | 4.25                                   | 3.09  | 22.6                          | 25.4                          | This work |

**Table S2.** IAST-calculated selectivities for the 50:50 binary gas mixtures at 273 K.

| Gas mixtures                                    | Selectivity |         |       |
|-------------------------------------------------|-------------|---------|-------|
|                                                 | 0.25 bar    | 0.5 bar | 1 bar |
| C <sub>2</sub> H <sub>2</sub> : CH <sub>4</sub> | 9.5         | 10.9    | 12.5  |
| C <sub>2</sub> H <sub>4</sub> : CH <sub>4</sub> | 9.3         | 10.2    | 10.9  |
| C <sub>2</sub> H <sub>6</sub> : CH <sub>4</sub> | 15.3        | 17.0    | 17.7  |

**Table S3.** IAST-calculated selectivities for the 50:50 binary gas mixtures at 295 K.

| Gas mixtures                                    | Selectivity |         |       |
|-------------------------------------------------|-------------|---------|-------|
|                                                 | 0.25 bar    | 0.5 bar | 1 bar |
| C <sub>2</sub> H <sub>2</sub> : CH <sub>4</sub> | 7.8         | 8.5     | 9.3   |
| C <sub>2</sub> H <sub>4</sub> : CH <sub>4</sub> | 7.9         | 8.4     | 9.0   |
| C <sub>2</sub> H <sub>6</sub> : CH <sub>4</sub> | 10.8        | 12.3    | 13.7  |

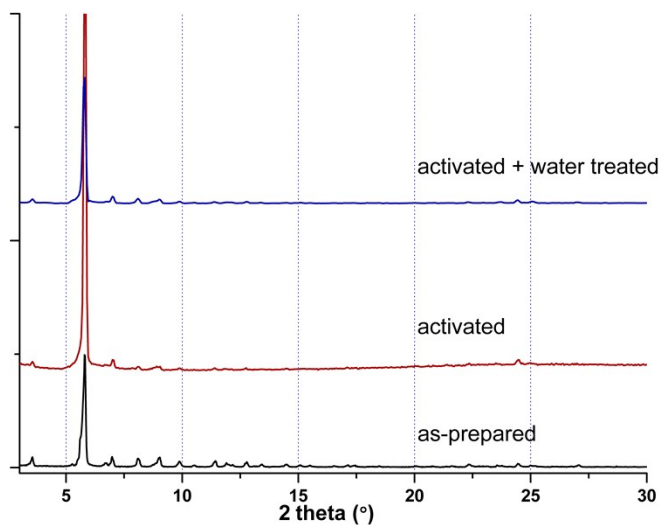

**Fig. S1** Comparison of powder X-ray diffraction patterns of HOF-BTB crystals. PXRD pattern of water-treated HOF-BTB is identical to those of both as-prepared and activated HOF-BTB crystals, meaning that the HOF-BTB crystals are stable in water. The crystals were immersed in water for 20 days immediately after having activation done at 120 °C.

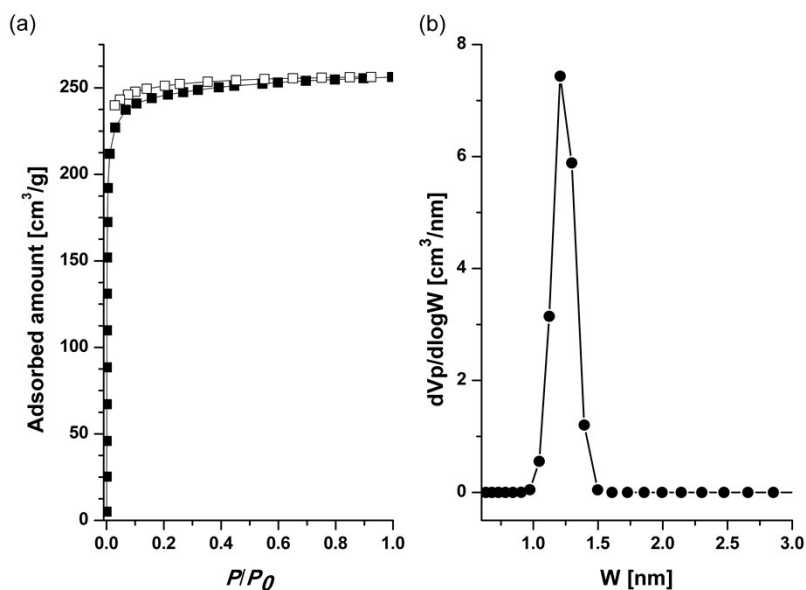

**Fig. S2** (a) N<sub>2</sub> adsorption isotherm of HOF-BTB at 77 K and (b) micropore size distribution calculated using NLDFT method.

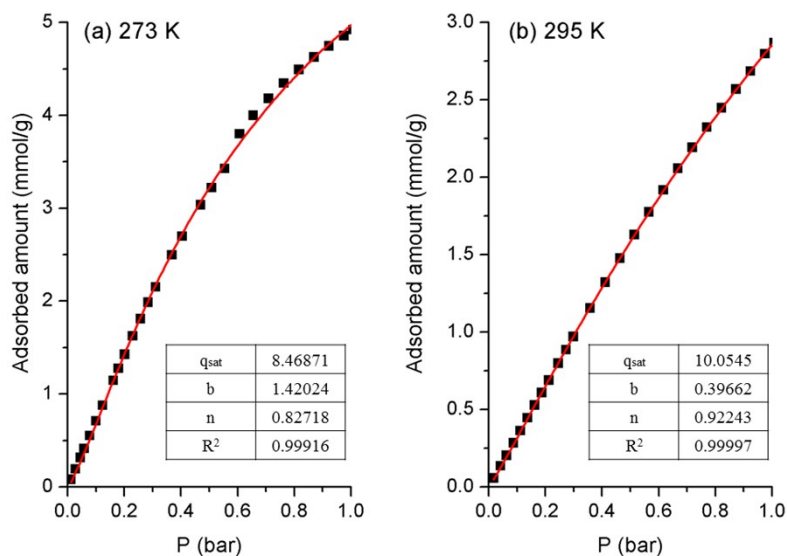

**Fig. S3** Single-site Langmuir-Freundlich fits of  $C_2H_2$  adsorption isotherms (Left: 273 K, Right: 295 K). The fitting results are presented in the inset tables.

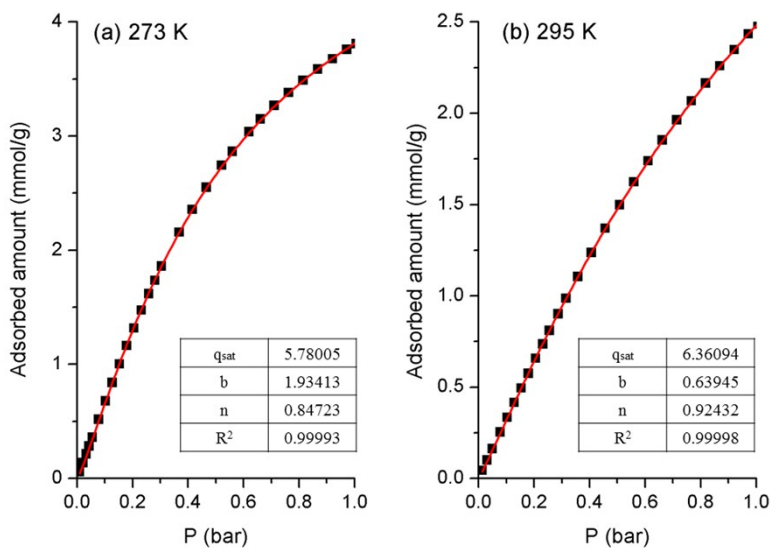

**Fig. S4** Single-site Langmuir-Freundlich fits of  $C_2H_4$  adsorption isotherms (Left: 273 K, Right: 295 K). The fitting results are presented in the inset tables.

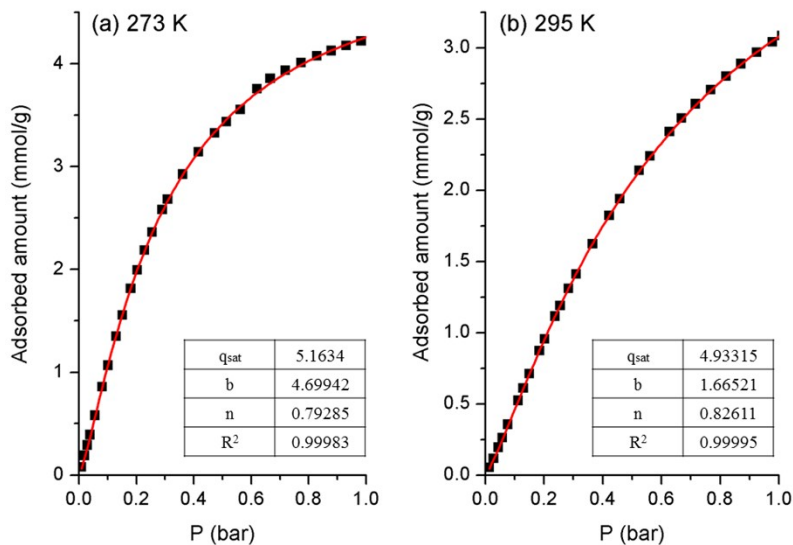

**Fig. S5** Single-site Langmuir-Freundlich fits of  $C_2H_6$  adsorption isotherms (Left: 273 K, Right: 295 K). The fitting results are presented in the inset tables.

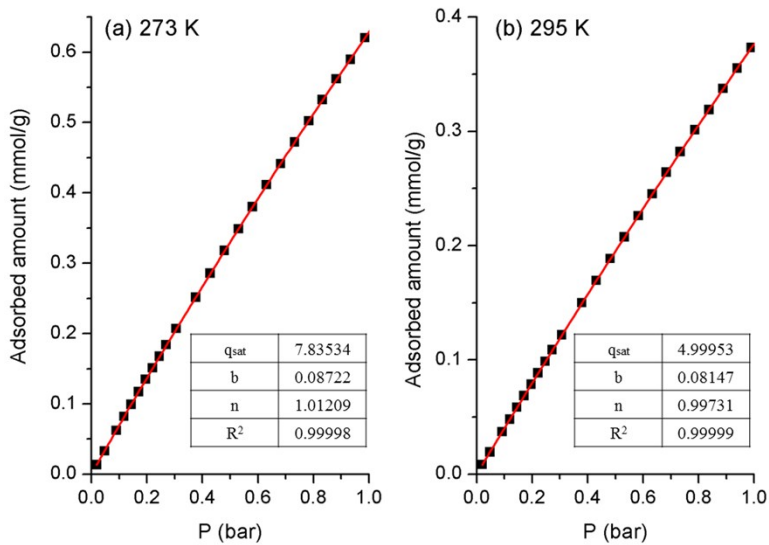

**Fig. S6** Single-site Langmuir-Freundlich fits of  $CH_4$  adsorption isotherms (Left: 273 K, Right: 295 K). The fitting results are presented in the inset tables.



## References

1. J. M. Simmons, H. Wu, W. Zhou and T. Yildirim, *Energy Environ. Sci.*, 2011, **4**, 2177-2185.
2. J.A. Mason, K. Sumida, Z. R. Herm, R Krishna and J. R. Long, *Energy Environ. Sci.*, 2011, **4**, 3030-3040.
3. Z. R. Herm, J. A. Swisher, B. Smit, R. Krishna and J. R. Long, *J. Am. Chem. Soc.*, 2011, **133**, 5664-5667.
4. S.-J. Lee, K.C. Kim, T.-U. Yoon, M.-B. Kim and Y.-S. Bae, *Microporous and Mesoporous Materials*, 2016, **236**, 284-291.
5. S.-J. Lee, T.-U. Yoon, A.-R. Kim, S.-Y. Kim, K.-H. Cho, Y. K. Hwang, J.-W. Yeon and Y.-S. Bae, *Journal of Hazardous Materials*, 2016, **320**, 513.
6. H. Ma, H. Ren, S. Meng, Z. Yan, H. Zhao, F. Sun and G. Zhu, *Chem. Commun.*, 2013, **49**, 9773.
7. H. Ma, H. Ren, S. Meng, F. Sun and G. Zhu, *Sci. Rep.*, 2013, **3**, 2611.
8. A. P. Katsoulidis and M. G. Kanatzidis, *Chem. Mater.*, 2012, **24**, 471.
9. L. A. Baldwin, J. W. Crowe, D. A. Pyles and P. L. McGrier, *J. Am. Chem. Soc.*, 2016, **138**, 15134.
10. J. Dong, Y. Wang, G. Liu, Y. Cheng and D. Zhao, *CrystEngComm*, 2017, **19**, 4899.
